# Supplementary material for: The Radiation-Transmission-Reception (RTR) model of propagation: Implications for the effectiveness of network interventions
Source: PubMed Central journal article supplement (PMC6281238; doi:10.1371/journal.pone.0207865), 2018-12-05
Supplement: pone.0207865.s001.pdf [file pone.0207865.s001.pdf]

This table provides an overview of all the symbols used in the equation in this manuscript, and describes their meaning.

| Symbol                                         | Meaning                                                                                                                                           |
|------------------------------------------------|---------------------------------------------------------------------------------------------------------------------------------------------------|
| $s_{i,t}$                                      | The state of actor $i$ at time $t$ .                                                                                                              |
| $A_{i,t}$ ( $\alpha_{i,e,t} \in A_{i,t}$ )     | A vector capturing the characteristics which influence the radiation per outgoing edge $e$ at time $t$ .                                          |
| $T^{rad}$                                      | The radiation memory duration, i.e. the number of time units after a change of state that this change can cause radiation.                        |
| $\tau_{rad}$                                   | The memory inflation factor, i.e. the extent to which past changes are amplified or dampened.                                                     |
| $u$                                            | The threshold for radiation, i.e. the amount of change in state required to result in radiation.                                                  |
| $p_{i,e,t}^{out} \in P_{i,t}^{out}$            | The pulse being radiated from actor $i$ to edge $e$ at time $t$ .                                                                                 |
| $T^{tra}$                                      | The memory duration for transmission sub-process, i.e. the number of time units a radiated pulse can cause transmission.                          |
| $\tau_{tra}$                                   | The memory inflation factor for the transmission sub-process, i.e. the extent to which past pulses are amplified or dampened during transmission. |
| $\phi_{e,t}$                                   | A vector of edge characteristics which influence transmission.                                                                                    |
| $p_{e,j,t}^{in}$                               | The pulse receive by actor $j$ from edge $e$ at time $t$ .                                                                                        |
| $T^{rec}$                                      | The memory duration for the reception sub-process, i.e. the number of time units a transmitted pulse can cause reception.                         |
| $\tau_{rec}$                                   | The memory inflation factor for reception sub-process, i.e. the extent to which past pulses are amplified or dampened during reception.           |
| $\Psi_{i,t}$ ( $\eta_{e,i,t} \in \Psi_{i,t}$ ) | A vector capturing actor specific characteristics influencing the reception per incoming edge $e$ on time $t$ .                                   |
| $q$                                            | The threshold for the reception sub-process, i.e. the amount of incoming pulses required to result in reception.                                  |
