# Supplementary material for: The Radiation-Transmission-Reception (RTR) model of propagation: Implications for the effectiveness of network interventions
Source: PubMed Central journal article supplement (PMC6281238; doi:10.1371/journal.pone.0207865), 2018-12-05
Supplement: pone.0207865.s002.pdf [file pone.0207865.s002.pdf]

Examples of interventions in propagation in practical settings. For each setting it shows how the propagation process can be divided into three sub-processes and how different interventions are linked to specific sub-processes.

| Setting                                      | Radiation                                                                                                 |                                                                                                                                                                                             | Transmission                                                                                                              |                                                                                                                                                                                                                                       | Reception                                                                                                                                                                          |                                                                                                                                                                                                                  |
|----------------------------------------------|-----------------------------------------------------------------------------------------------------------|---------------------------------------------------------------------------------------------------------------------------------------------------------------------------------------------|---------------------------------------------------------------------------------------------------------------------------|---------------------------------------------------------------------------------------------------------------------------------------------------------------------------------------------------------------------------------------|------------------------------------------------------------------------------------------------------------------------------------------------------------------------------------|------------------------------------------------------------------------------------------------------------------------------------------------------------------------------------------------------------------|
|                                              | Process                                                                                                   | Intervention                                                                                                                                                                                | Process                                                                                                                   | Intervention                                                                                                                                                                                                                          | Process                                                                                                                                                                            | Intervention                                                                                                                                                                                                     |
| <b>Spread of financial crisis</b>            | A bank becomes insolvent and defaults on a loan                                                           | <i>Capital injections</i> from central banks may change the state of the insolvent bank, making it solvent again before any propagation can occur. This prevents the radiation of a signal. | The loans between banks causes the default of one bank to result in a loss for a connected bank.                          | <i>Guarantees, securities and derivatives</i> can ensure defaulted loans are still (partially) covered, reducing the signal which reaches the alter.                                                                                  | The other bank will incur a loss from the defaulted loan and can absorb this loss or change state to become insolvent.                                                             | <i>Enforcing an increase in the liquidity buffers</i> results in banks being less likely to also become insolvent when incurring losses from other defaults.                                                     |
| <b>Contagion of disease</b>                  | A person becomes sick and spreads the viral load/germs in the direction of others, i.e. through sneezing. | <i>Quarantine interventions</i> , such as telling people to stay at home, reduce their interaction with friends and hence reduce the chance of spreading the disease to these friends.      | The transfer of viral load/germs to other people (alters), i.e. being hit by a sneeze or touching a contaminated surface. | Getting those people who are infected to <i>wear protective masks, and/or wash their hands</i> extensively will reduce the viral load/germs an individual will spread and hence reduce the transmission of the virus to other people. | The alter responds to the viral load/germs being received. They attempt to fight off the infection, and either succeeds, so the disease does not propagate, or fail and gets sick. | <i>Immunization</i> decreases the susceptibility of actors, as immunized actors are considered to react differently to incoming signals. Through immunization, the reception process of these actors is changed. |
| <b>Adoption of innovation</b>                | A firm adopts a new production technique and its employees start to talk about this adoption.             | Communication or visibility is reduced or increased by means of <i>confidentiality or advertising agreements</i> .                                                                          | Other firms becoming aware of the adoption, through interaction. This can be by communication or observation.             | By <i>using a different means of communication or changing the transparency</i> the extent to which the signal reaches an alter can be changed.                                                                                       | Other firms make a decision on whether to also adopt the innovation, based on the signals they receive via their network.                                                          | By <i>changing the investment costs</i> (subsidizing or licensing) the other firms will become more, or less, prone to adopt the innovation.                                                                     |
| <b>Diffusion of information or knowledge</b> | A person has a certain piece of novel information and decides to share this.                              | <i>Rewarding sharing activity with status</i> (as is often done on online forums) incentivizes the sharing of information.                                                                  | Communication among individuals allows the information to be spread from one person to another.                           | By <i>using a different medium</i> (e.g., telegram vs. video-conferencing) the richness of communication can be changed, thus improving or reducing the extent to which the information is understood during transmission.            | The alter receives the information and fits this to his or her existing knowledge and decides to accept or reject the information, in full or in part.                             | By <i>decreasing or increasing the utility</i> (novelty) of the information being shared, the willingness to accept such information can be increased.                                                           |
