# Supplementary material for: The Radiation-Transmission-Reception (RTR) model of propagation: Implications for the effectiveness of network interventions
Source: PubMed Central journal article supplement (PMC6281238; doi:10.1371/journal.pone.0207865), 2018-12-05
Supplement: pone.0207865.s004.pdf [file pone.0207865.s004.pdf]

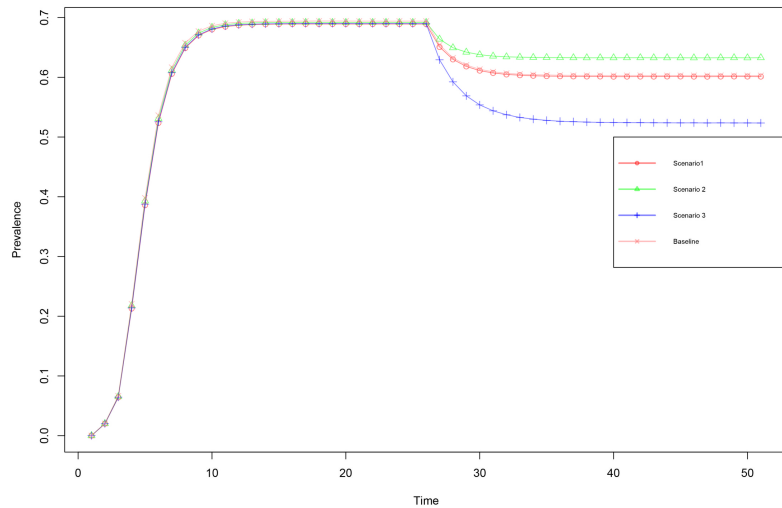

**A.** The mean prevalence over time for network 1 with a random seeding strategy is depicted for the four scenarios with the same overarching propagation likelihood ( $\lambda = 0.192$ ). Scenario1, the red open circles, is a process with  $\alpha = 0.4$ ,  $\phi = 0.6$  and  $\eta = 0.8$ . Scenario2, the green triangles, a process with  $\alpha = 0.6$ ,  $\phi = 0.8$  and  $\eta = 0.4$ . Scenario3, blue pluses, a process with  $\alpha = 0.8$ ,  $\phi = 0.4$  and  $\eta = 0.6$ . Scenario 4, the pink crosses, a process with homogeneous sub-processes ( $\alpha = \phi = \eta = 0.5769$ ). During the simulation at  $t = 25$  an intervention (reduction of 0.2) in the Transmission is applied.

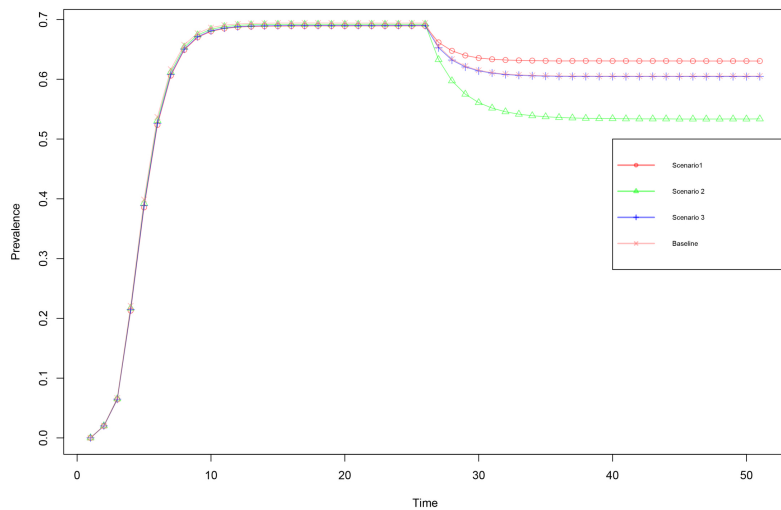

**B.** The mean prevalence over time for network 1 with a random seeding strategy is depicted for the four scenarios with the same overarching propagation likelihood ( $\lambda = 0.192$ ). Scenario1, the red open circles, is a process with  $\alpha = 0.4$ ,  $\phi = 0.6$  and  $\eta = 0.8$ . Scenario2, the green triangles, a process with  $\alpha = 0.6$ ,  $\phi = 0.8$  and  $\eta = 0.4$ . Scenario3, blue pluses, a process with  $\alpha = 0.8$ ,  $\phi = 0.4$  and  $\eta = 0.6$ . Scenario 4, the pink crosses, a process with homogeneous sub-processes ( $\alpha = \phi = \eta = 0.5769$ ). During the simulation at  $t = 25$  an intervention (reduction of 0.2) in the Reception is applied.
