# Supplementary material for: The Radiation-Transmission-Reception (RTR) model of propagation: Implications for the effectiveness of network interventions
Source: PubMed Central journal article supplement (PMC6281238; doi:10.1371/journal.pone.0207865), 2018-12-05
Supplement: pone.0207865.s006.pdf [file pone.0207865.s006.pdf]

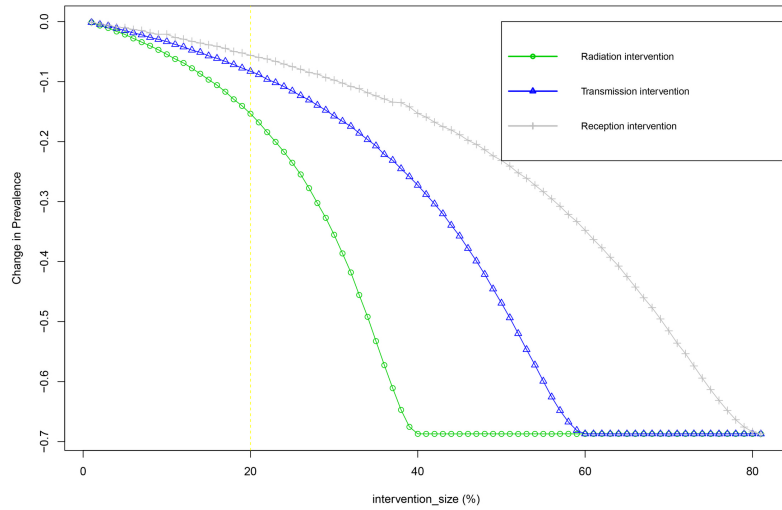

A. The mean reduction in prevalence (y-axis) in scenario 1 ( $\alpha = 0.4$ ,  $\phi = 0.6$  and  $\eta = 0.8$ ) in network 1, with random seeding, for interventions of various size(x-axis) across the different target processes, green circles for interventions in Radiation ( $\alpha$ ), blue triangles for interventions in transmission ( $\phi$ ), and gray pluses for interventions in reception ( $\eta$ )

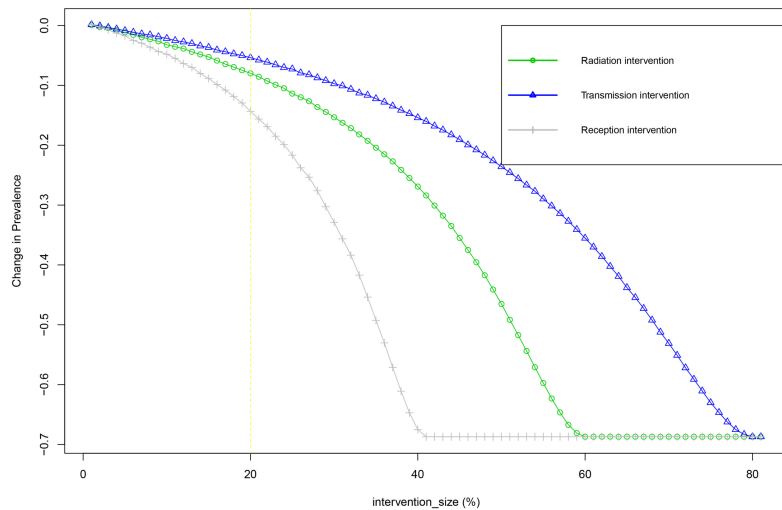

B. The mean reduction in prevalence (y-axis) in scenario 2 ( $\alpha = 0.6$ ,  $\phi = 0.8$  and  $\eta = 0.4$ ) in network 1, with random seeding, for interventions of various size(x-axis) across the different target processes, green circles for interventions in Radiation ( $\alpha$ ), blue triangles for interventions in transmission ( $\phi$ ), and gray pluses for interventions in reception ( $\eta$ )
